# Supplementary material for: Solid state plasmonic dye sensitized solar cells based on solution processed perovskite CsSnI3 as the hole transporter
Source: Royal Society of Chemistry journal article supplement (doi:10.1039/c4ra09719j), 2014-01-01
Supplement: c4ra09719j1.pdf [file c4ra09719j1.pdf]

## **Electronic supplementary information**

### **Solid state plasmonic dye sensitized solar cells based on solution processed perovskite CsSnI<sub>3</sub> as the hole transporter**

Nikhil Chander, P.S. Chandrasekhar, Vamsi K. Komarala

Photovoltaic Laboratory, Centre for Energy Studies, Indian Institute of Technology Delhi, New Delhi-110016, INDIA.

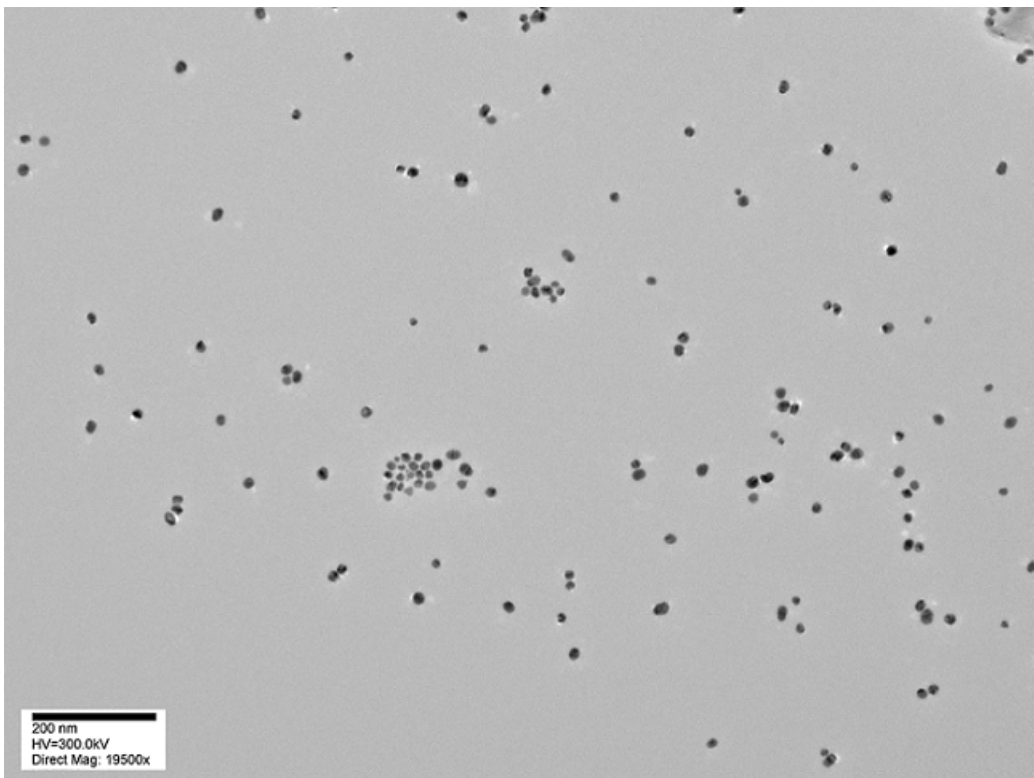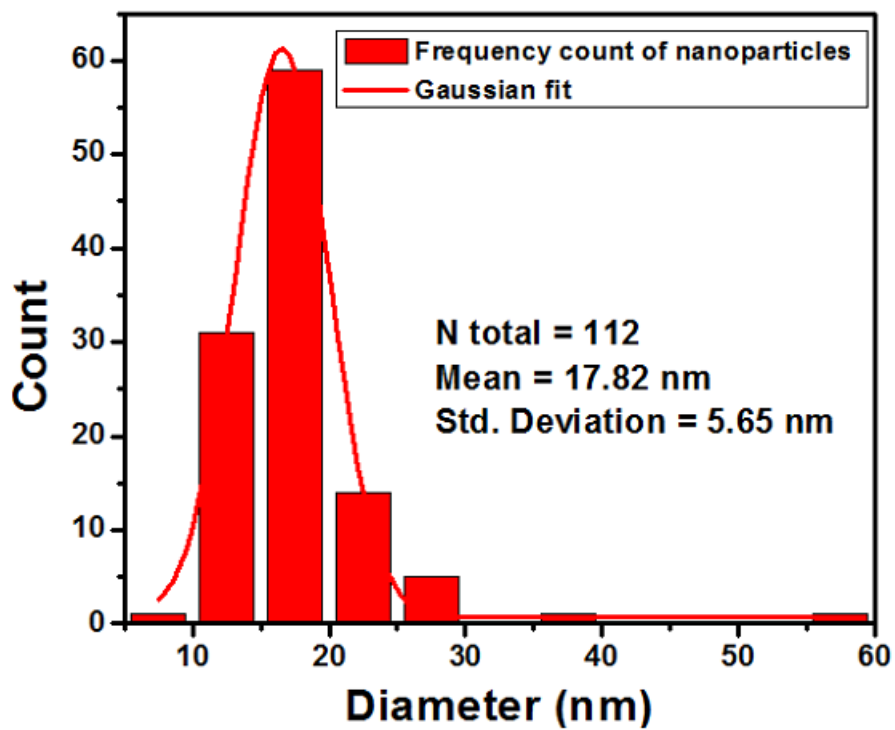

Figure S1: Transmission electron micrograph, and size distribution of gold nanoparticles used in the present study.

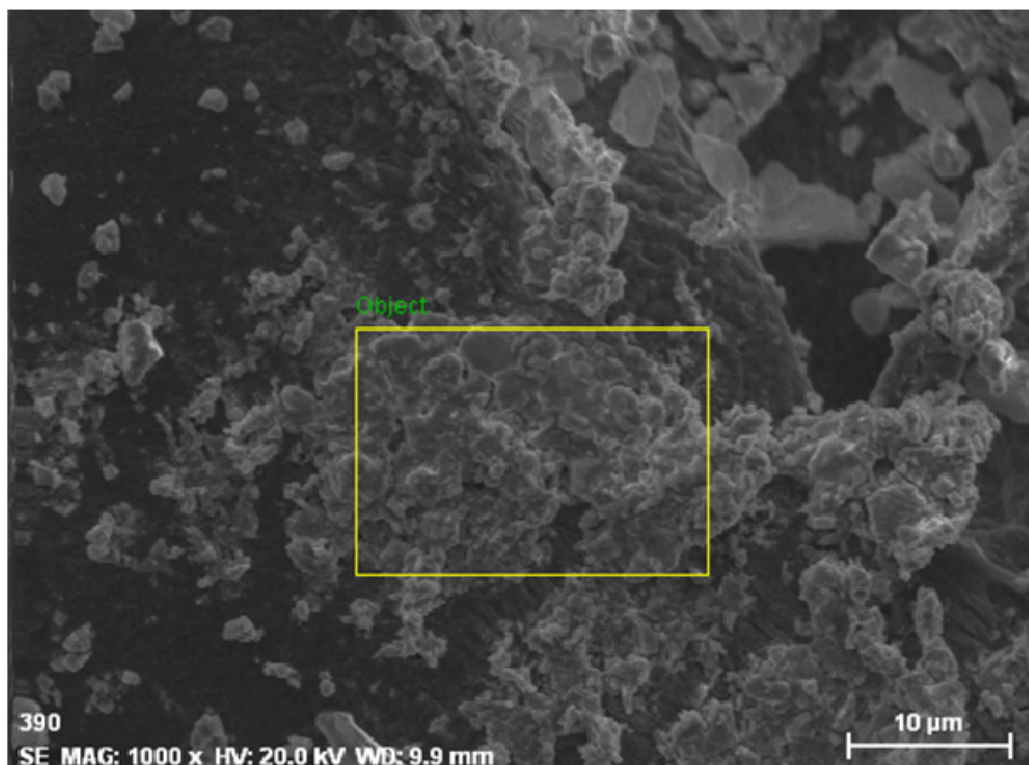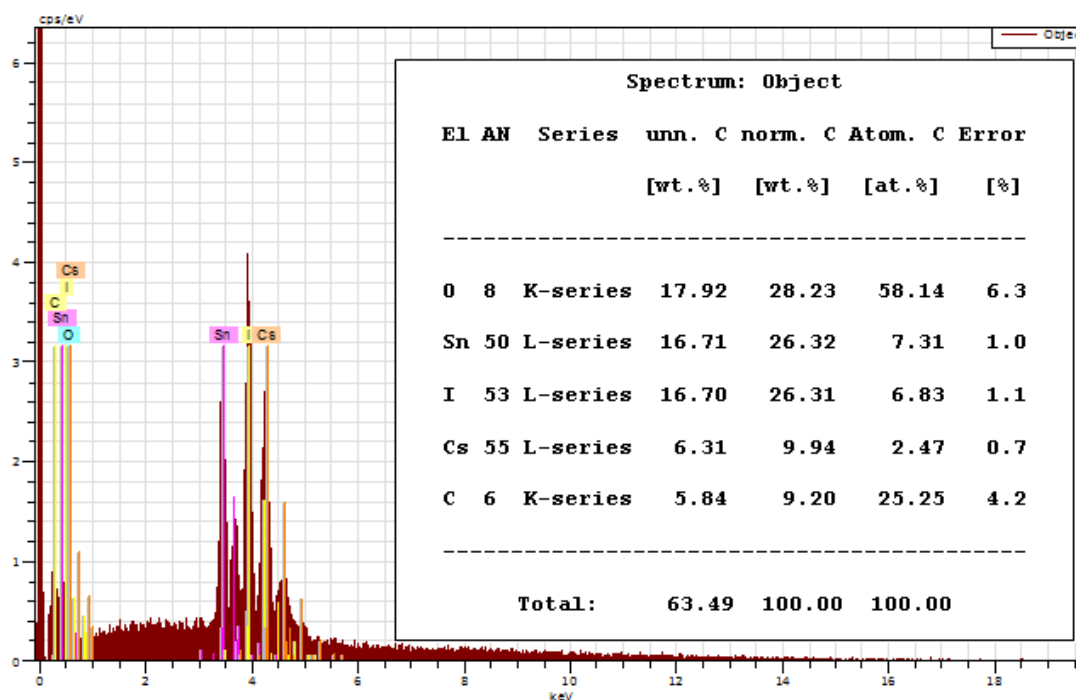

Figure S2a: Energy dispersive X-ray (EDX) spectra of solution synthesized perovskite CsSnI<sub>3</sub> (sample 1) recorded using Zeiss EVO50 scanning electron micrograph equipped with EDX detector.

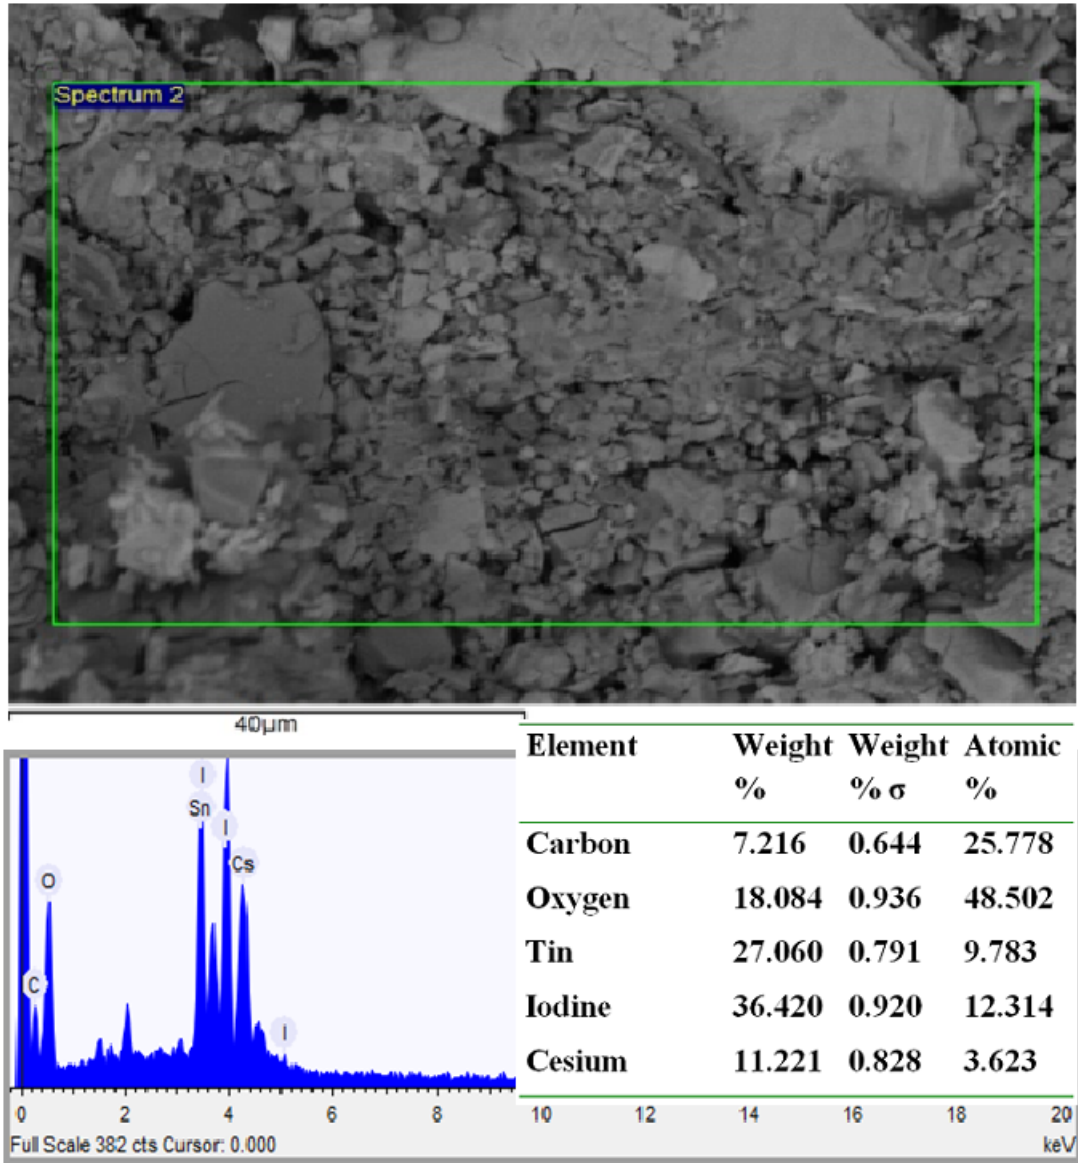

Figure S2b. Energy dispersive X-ray (EDX) spectra of solution synthesized perovskite  $\text{CsSnI}_3$  (sample 2) recorded using Hitachi TM3000 table-top scanning electron micrograph equipped with SwiftED 3000 EDX detector.

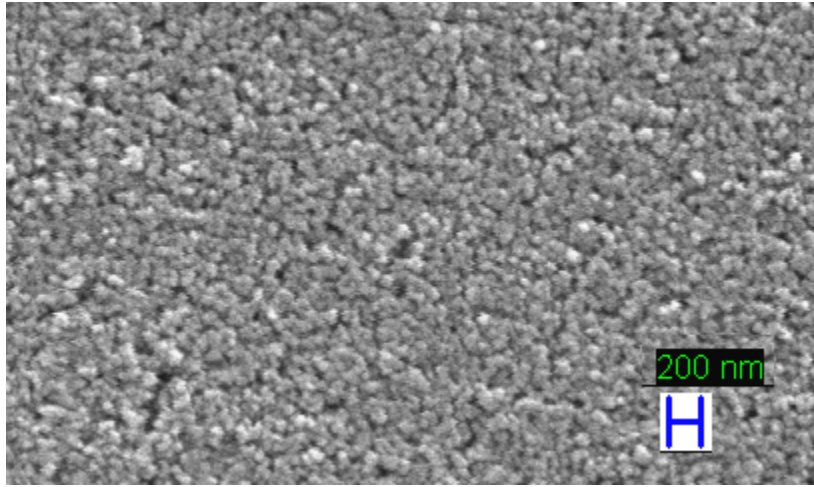

Figure S3: Scanning electron micrograph of porous TiO<sub>2</sub> film deposited by doctor blade method.
